# Supplementary material
Source: MDPI journal article supplement (https://www.mdpi.com/2227-9040/9/12/338)
Supplement: s1 [file s1]

# Preparation of a Molecularly Imprinted Film on Quartz Crystal Microbalance Chip for Determination of Furanic Compounds

Wei-Liang Lin <sup>1</sup>, Chung-Yin Lin <sup>2,3,\*</sup> and Dar-Fu Tai <sup>1,4,\*</sup>

<sup>1</sup> Department of Chemistry, National Dong Hwa University, Hualien 97403, Taiwan; usanawes@gmail.com

<sup>2</sup> Medical Imaging Research Center, Institute for Radiological Research, Chang Gung University and Chang Gung Memorial Hospital, Taoyuan 33302, Taiwan

<sup>3</sup> Department of Nephrology and Clinical Poison Center, Chang Gung Memorial Hospital, Taoyuan 33302, Taiwan

<sup>4</sup> Department of Life Science and Institute of Biotechnology, National Dong Hwa University, Hualien 97403, Taiwan

\* Correspondence: winwood7@mail.cgu.edu.tw (C.-Y.L.); dftai@gms.ndhu.edu.tw (D.-F.T.);  
Tel.: +886-3-2118800 (ext. 3865) (C.-Y.L.); +886-3-890-3579 (D.-F.T.)

## Supporting Information

### 3. Results and Discussion

*3.1. Synthesis and properties of (Methacr-L-Cys-NHBn)<sub>2</sub> and (Methacr-L-Ser-NHBn) Characterization of (Methacr-L-Cys-NHBn)<sub>2</sub>*

Mass (MALDI) = 555.28 m/z

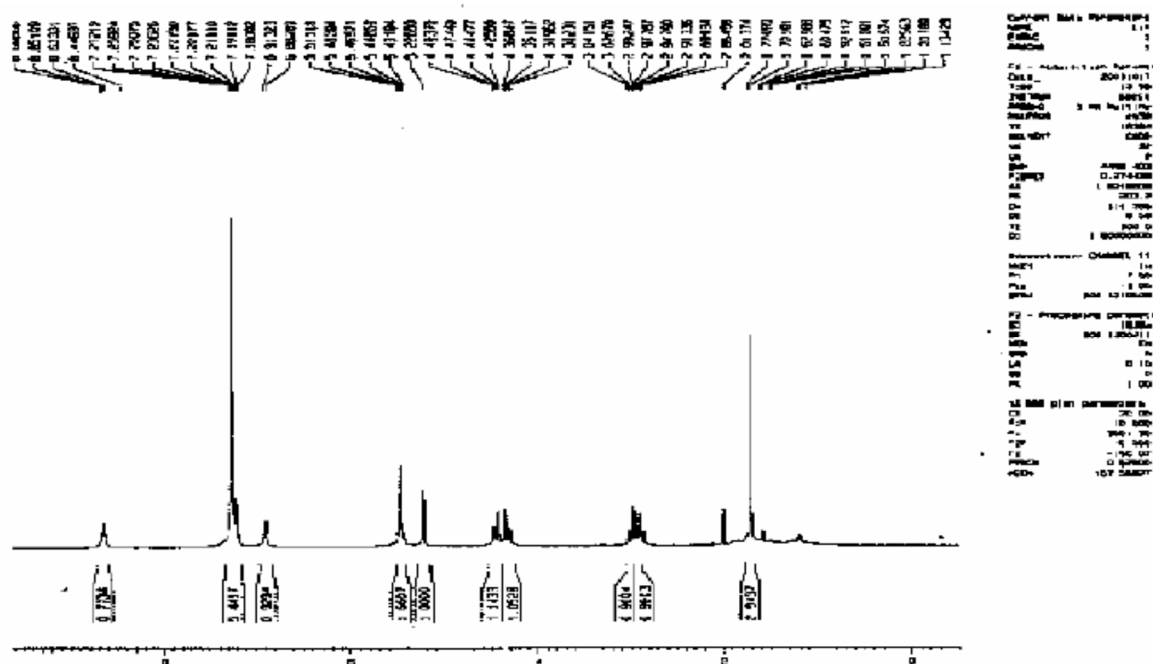

**Figure S1.**  $^1\text{H}$  NMR spectrum of (Methacr-L-Cys-NHBn) $_2$ .

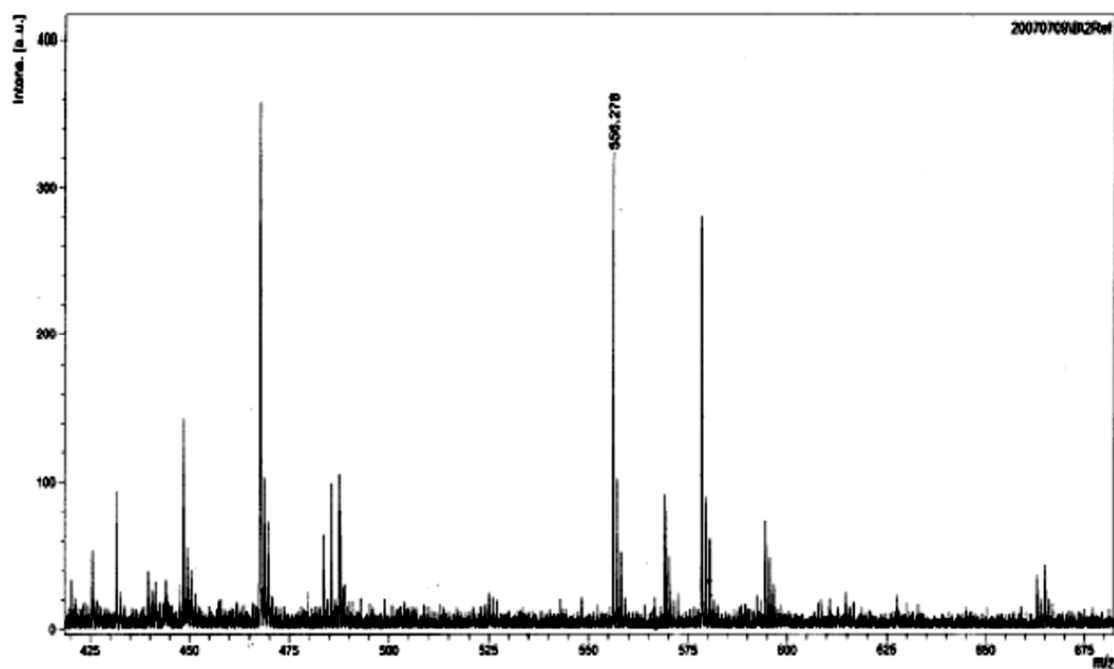

Figure S2.  $^{13}\text{C}$  NMR spectrum of (Methacr-L-Cys-NHBn) $_2$ .

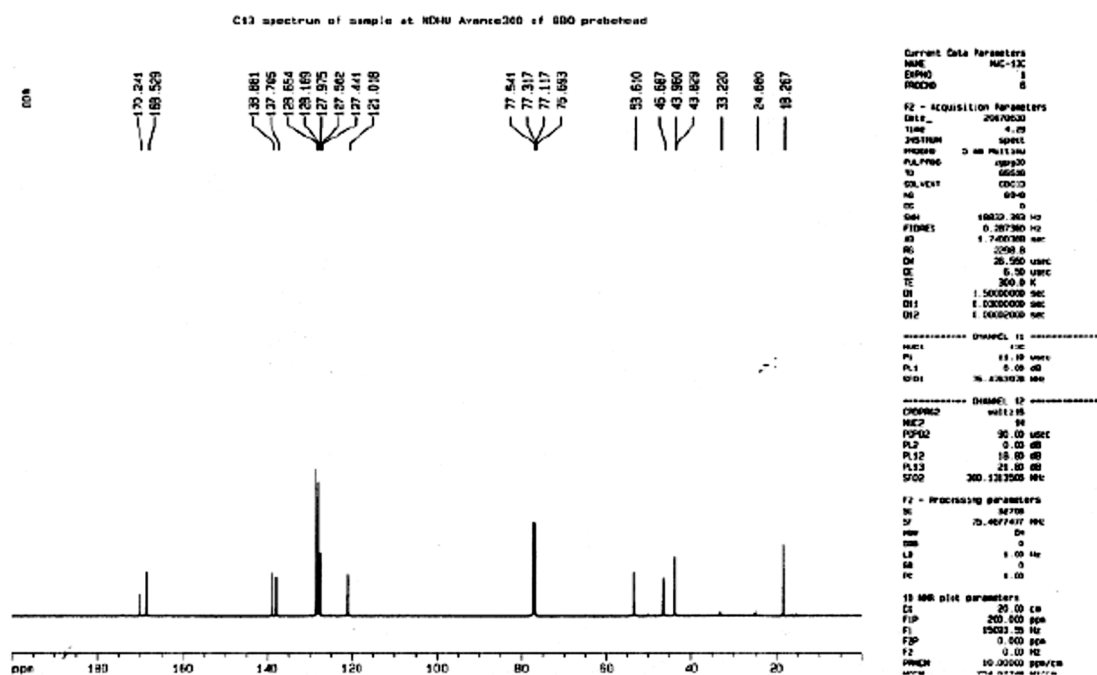

Figure S3. Mass spectrum of (Methacr-L-Cys-NHBn) $_2$ .

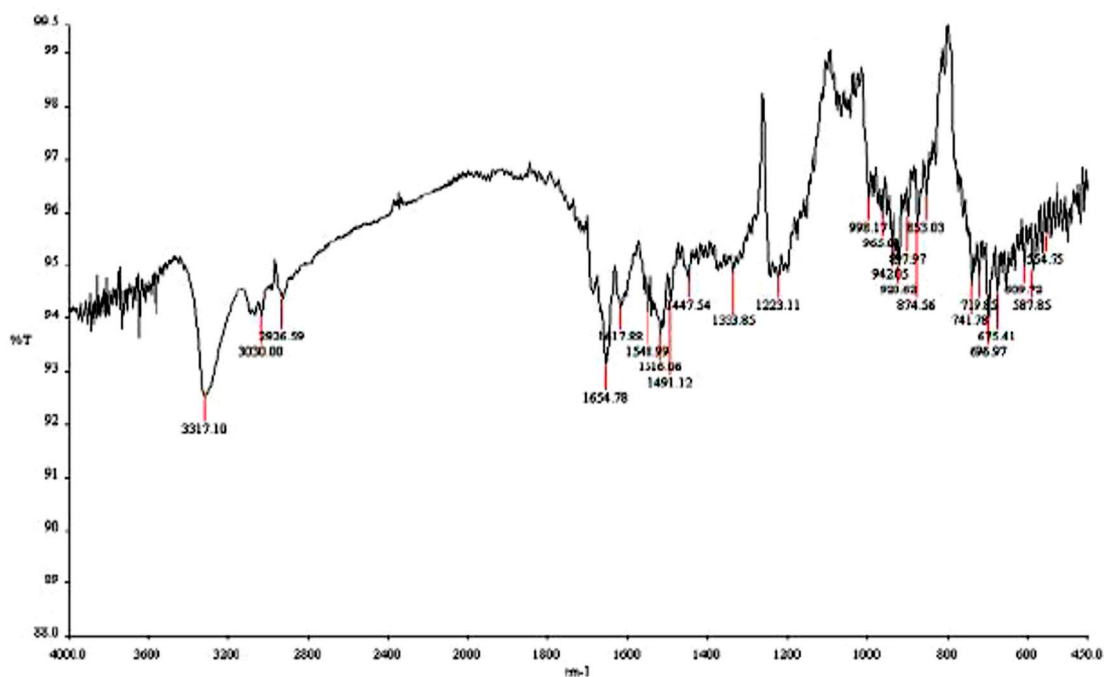

Figure S4. IR spectrum of (Methacr-L-Cys-NHBn)<sub>2</sub>.

### 3.2. Characterization of Methacr-L-Ser-NHBn

<sup>1</sup>H NMR (300 MHz, MeOH-d<sub>4</sub>, δ): 1.95 (s, 3H), 3.82 (m, 2H), 4.44-4.46 (d, 2H), 4.56-4.59 (m, 1H), 5.43 (s, 1H), 5.81 (s, 1H), 7.24-7.34 (m, 5H).

<sup>13</sup>C NMR (75.5 MHz, MeOH-d<sub>4</sub>, δ): 17.3, 42.8-43.2, 55.6-55.8, 61.5-61.7, 120, 126.78-126.84, 127.01-127.1, 128.13, 138.3-139.5, 142.6, 169.68, 170.85-171.1  
IR(cm<sup>-1</sup>): 1041.80, 1658.52, 2879.10-2939.32, 3313.70

[α]<sub>D</sub><sup>25</sup> = -8.33° (MeOH, c=0.3, l=1 dm)

Mass (MALDI) = 262.42 m/z

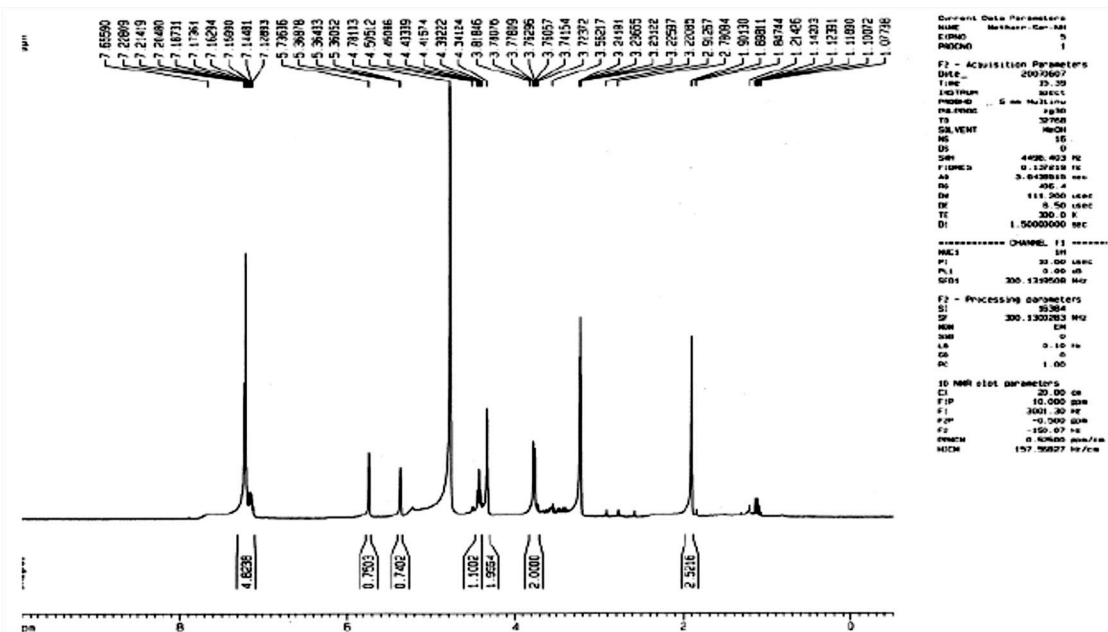

Figure S5.  $^1\text{H}$  NMR spectrum of Methacr-L-Ser-NHBn.

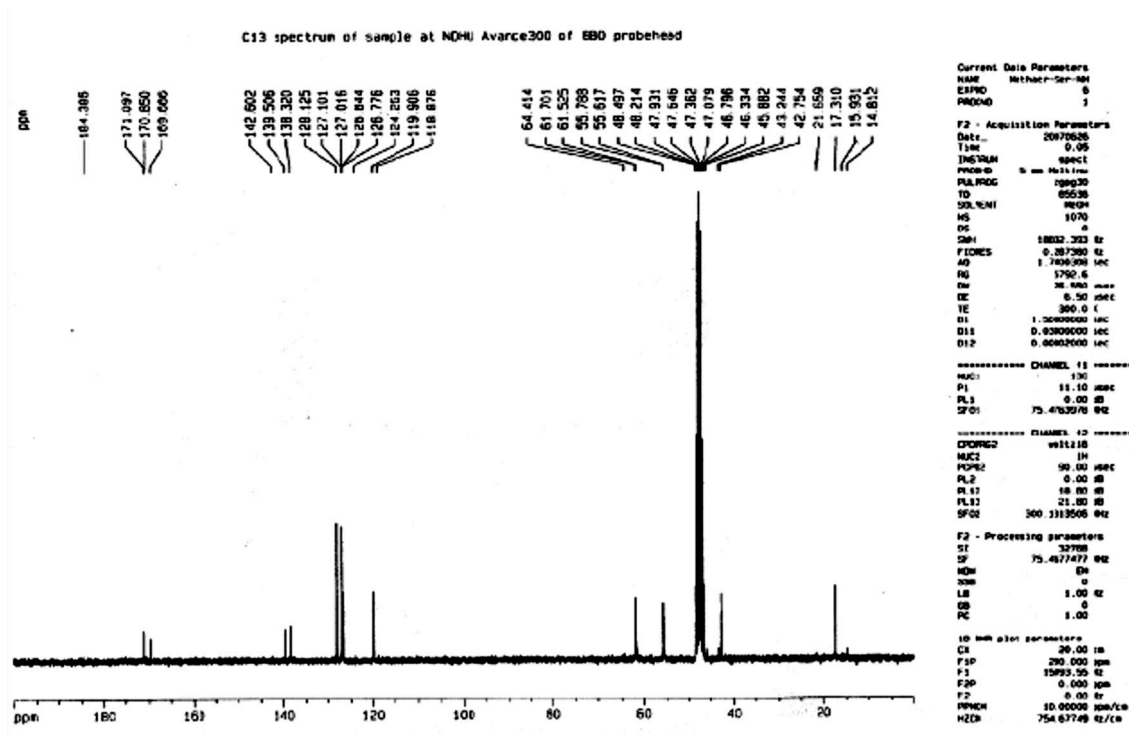

Figure S6.  $^{13}\text{C}$  NMR spectrum of Methacr-L-Ser-NHBn.

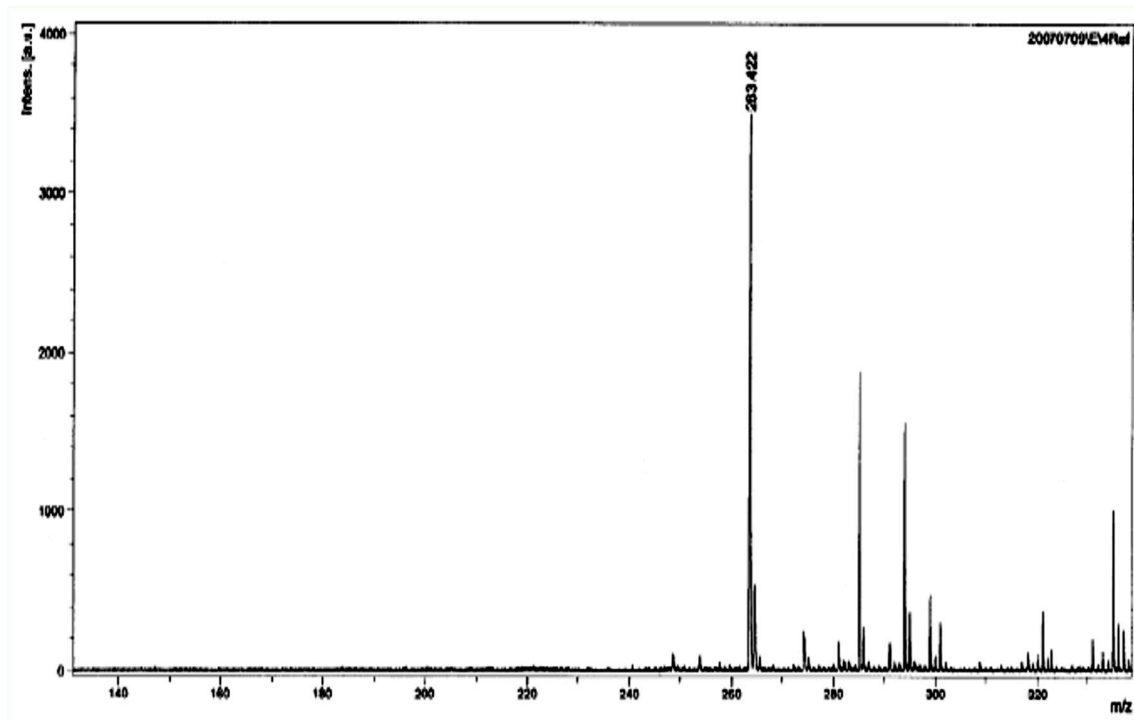

Figure S7. Mass spectrum of Methacr-L-Ser-NHBn.

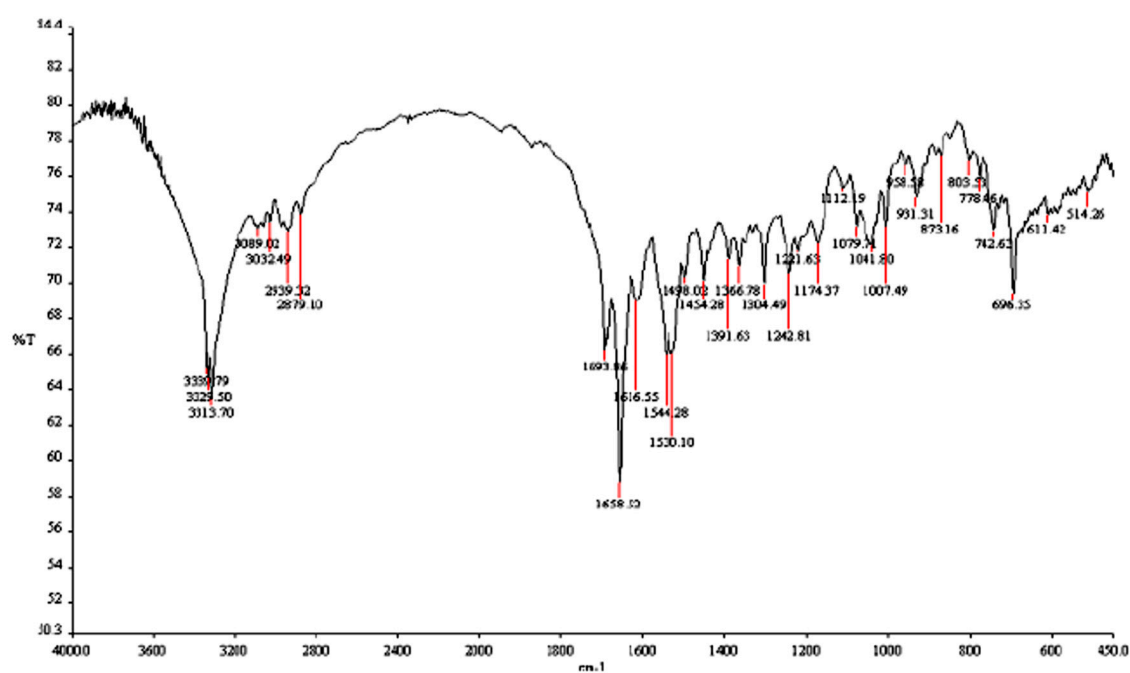

Figure S8. IR spectrum of Methacr-L-Ser-NHBn.
